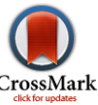

# Anti-Inflammatory Effects of Progesterone in Lipopolysaccharide-Stimulated BV-2 Microglia

Beilei Lei<sup>1,2</sup>, Brian Mace<sup>3</sup>, Hana N. Dawson<sup>3</sup>, David S. Warner<sup>1,2,4</sup>, Daniel T. Laskowitz<sup>1,2,3,4</sup>, Michael L. James<sup>1,2,3\*</sup>

**1** Multidisciplinary Neuroprotection Laboratories, Duke University Medical Center, Durham, North Carolina, United States of America, **2** Department of Anesthesiology, Duke University Medical Center, Durham, North Carolina, United States of America, **3** Department of Neurology, Duke University Medical Center, Durham, North Carolina, United States of America, **4** Department of Neurobiology, Duke University Medical Center, Durham, North Carolina, United States of America

## Abstract

Female sex is associated with improved outcome in experimental brain injury models, such as traumatic brain injury, ischemic stroke, and intracerebral hemorrhage. This implies female gonadal steroids may be neuroprotective. A mechanism for this may involve modulation of post-injury neuroinflammation. As the resident immunomodulatory cells in central nervous system, microglia are activated during acute brain injury and produce inflammatory mediators which contribute to secondary injury including proinflammatory cytokines, and nitric oxide (NO) and prostaglandin E<sub>2</sub> (PGE<sub>2</sub>), mediated by inducible NO synthase (iNOS) and cyclooxygenase-2 (COX-2), respectively. We hypothesized that female gonadal steroids reduce microglia mediated neuroinflammation. In this study, the progesterone's effects on tumor necrosis factor alpha (TNF- $\alpha$ ), iNOS, and COX-2 expression were investigated in lipopolysaccharide (LPS)-stimulated BV-2 microglia. Further, investigation included nuclear factor kappa B (NF- $\kappa$ B) and mitogen activated protein kinase (MAPK) pathways. LPS (30 ng/ml) upregulated TNF- $\alpha$ , iNOS, and COX-2 protein expression in BV-2 cells. Progesterone pretreatment attenuated LPS-stimulated TNF- $\alpha$ , iNOS, and COX-2 expression in a dose-dependent fashion. Progesterone suppressed LPS-induced NF- $\kappa$ B activation by decreasing inhibitory  $\kappa$ B $\alpha$  and NF- $\kappa$ B p65 phosphorylation and p65 nuclear translocation. Progesterone decreased LPS-mediated phosphorylation of p38, c-Jun N-terminal kinase and extracellular regulated kinase MAPKs. These progesterone effects were inhibited by its antagonist mifepristone. In conclusion, progesterone exhibits pleiotropic anti-inflammatory effects in LPS-stimulated BV-2 microglia by down-regulating proinflammatory mediators corresponding to suppression of NF- $\kappa$ B and MAPK activation. This suggests progesterone may be used as a potential neurotherapeutic to treat inflammatory components of acute brain injury.

**Citation:** Lei B, Mace B, Dawson HN, Warner DS, Laskowitz DT, et al. (2014) Anti-Inflammatory Effects of Progesterone in Lipopolysaccharide-Stimulated BV-2 Microglia. PLoS ONE 9(7): e103969. doi:10.1371/journal.pone.0103969

**Editor:** Karin E. Peterson, National Institute of Allergy and Infectious Diseases - Rocky Mountain Laboratories, United States of America

**Received:** April 1, 2014; **Accepted:** July 8, 2014; **Published:** July 31, 2014

**Copyright:** © 2014 Lei et al. This is an open-access article distributed under the terms of the Creative Commons Attribution License, which permits unrestricted use, distribution, and reproduction in any medium, provided the original author and source are credited.

**Data Availability:** The authors confirm that all data underlying the findings are fully available without restriction. All relevant data are within the paper and its Supporting Information files.

**Funding:** This work was supported by American Heart Association-Scientist Development Grant (MLJ). The funders had no role in study design, data collection and analysis, decision to publish, or preparation of the manuscript.

**Competing Interests:** The authors have declared that no competing interests exist.

\* Email: Michael.james@duke.edu

## Introduction

Numerous studies indicate that progesterone regulates multiple non-reproductive functions in the brain including cognition, memory, and neurogenesis [1,2,3,4]. Progesterone elicits its effects via progesterone receptors (PRs), which include classical nuclear PRs (two major isoforms PR-A and PR-B) and recently recognized membrane PRs [3,5,6,7]. The classical mechanism of progesterone action is mediated by nuclear PRs, which function as transcription factors by binding to specific progesterone response elements within the promoter region of target genes to modulate transcription and genomic networks [3,4,8]. Non-classical mechanisms have been recently suggested to involve membrane PRs and cytoplasmic kinase activation and signal cascades [3,4,8].

Progesterone exerts neuroprotective effects in several experimental acute brain injury models, including traumatic brain injury [9,10,11,12,13,14], ischemic stroke [15,16,17,18,19,20,21], and subarachnoid hemorrhage [22,23]. Progesterone has also demonstrated potential for clinical translation, having shown promise for

treatment of traumatic brain injury in two independent phase II clinical trials [24,25]; this approach is currently in phase III clinical trials (<http://clinicaltrials.gov/ct2/show/record/NCT00822900>). Preclinical studies suggest that progesterone may improve neurobehavioral outcomes by inhibition of neuroinflammation, oxidative stress, and neuronal death [10,11,13,20]. However, specific underlying mechanisms remain unclear.

Microglia, the resident immune cells in the central nervous system, play important roles in the brain's innate immunity and response to injury. Increasing evidence indicates microglial over-activation after acute brain injury results in excess production of proinflammatory mediators including tumor necrosis factor  $\alpha$  (TNF $\alpha$ ), prostaglandin E<sub>2</sub> (PGE<sub>2</sub>), and nitric oxide (NO), which then contribute to secondary brain injury and exacerbate neuronal injury [26,27,28,29]. NO and PGE<sub>2</sub> are the products of inducible nitric oxide synthase (iNOS) and cyclooxygenase-2 (COX-2), respectively. Regulation of iNOS, COX-2 and TNF $\alpha$  expression involves transcriptional factor nuclear factor kappa B (NF- $\kappa$ B)

[27,30,31] and mitogen activated protein kinases (MAPKs) [32,33].

Lipopolysaccharide (LPS), a toll-like receptor ligand, induces microglia activation and neuroinflammation. The immortalized murine BV-2 microglia cell line is commonly used as a substitute for primary microglia in experimental studies [34,35,36]. To investigate progesterone's molecular effects on neuroinflammation, BV-2 microglia cells were employed to test the effects of progesterone on the LPS-induced TNF- $\alpha$ , iNOS, and COX-2 expression. Since both NF- $\kappa$ B and MAPK pathways participate in the regulation of neuroinflammation [26,27,29], both pathways were examined as possible underlying molecular mechanisms.

## Materials and Methods

### Materials

Reagents and suppliers were: LPS (L6143), progesterone (P8783), mifepristone (M8046) (Sigma, St. Louis, MO); High Glucose Dulbecco's Modified Eagle Medium (DMEM) (11995), phenol red free DMEM (31053), L-glutamine, sodium pyruvate, Pen/Strep and fetal bovine serum (Gibco, Grand Island, NY); NE-PER nuclear and cytoplasmic extraction reagents (78833), BCA protein assay kit (23227), restore stripping buffer (21059) and supersignal west dura extended duration substrate (34076) (Thermo Scientific, Rockford, IL); mouse TNF- $\alpha$  DuoSet enzyme-linked immunosorbent assay (ELISA) kit (DY410, R&D Systems, Minneapolis, MN); Antibodies against NF- $\kappa$ B p65 (4764), phospho-NF- $\kappa$ B (3033), I $\kappa$ B- $\alpha$  (9242), phospho-I $\kappa$ B $\alpha$  (9246), p38 (9212) and phospho-p38 (9211) MAPK, p44/42 (9102) and phospho-p44/42 (9101) MAPK, JNK (9252), phospho-JNK (9251), GAPDH (2118) (Cell signaling, Beverly, MA); COX-2 antibody (160106) (Cayman chemical, Ann Arbor, MI); antibodies against progesterone receptor (sc-7208), NOS2 (sc-650) and secondary HRP antibodies (Santa Cruz Biotechnology, Santa Cruz, CA).

### Cell culture

BV-2, an immortalized mouse microglia cell line [34], was maintained in high glucose DMEM supplemented with 10% FBS and 1x penicillin/streptomycin in a humidified atmosphere containing 5% CO<sub>2</sub> at 37°C.

### Immunofluorescence staining

Cells were grown on glass coverslips in complete medium for one day. After aspiration of medium, cells were fixed at room temperature for 10 min with 3.7% formaldehyde in PBS, permeabilized in the same solution with 0.05% Triton X-100 for 10 min, and washed 3 times with PBS before 30 min of blocking in 10% FBS/PBS with 0.05% Triton X-100, and then incubated with primary antibodies to progesterone receptor (1:100) overnight at 4°C in blocking buffer. After washing with PBS 3 times, cells were incubated at 25°C for 30 min with secondary goat anti-rabbit IgG Rhodamine Red X (Invitrogen) at 1:1000 dilution in blocking buffer prior to washes with PBS, mounting with anti-fading buffer with DAPI and fluorescent microscopy analysis. Images were processed with Adobe Photoshop software (Adobe Systems Inc., San Jose, CA).

### Treatments

Prior to all experiments, BV-2 cells near confluence were trypsinized and plated in 12- or 6-well plates in complete DMEM for 1 day, and then washed and transferred to serum free and no phenol red DMEM with 1x L-glutamine and 1x sodium pyruvate for treatment. For time course experiments, cells were incubated

with 30 ng/ml LPS for different time periods from 0 to 24 h. Pretreatment of escalated concentrations of progesterone (10<sup>-8</sup> to 10<sup>-6</sup> M) was given 1 h before addition of 30 ng/ml LPS. Post-treatment with progesterone was given 5, 30, or 60 min post LPS. In additional experiments, the progesterone receptor antagonist mifepristone (10<sup>-9</sup> to 10<sup>-7</sup> M) was given 30 min before progesterone. At pre-specified time points, cell supernatants were collected for TNF- $\alpha$  ELISA, and cells were lysed for western blot analyses.

### Quantification of TNF- $\alpha$

Cell supernatants were collected and spun at 10,000 g for 1 min to exclude particulates. Supernatant TNF- $\alpha$  was measured by ELISA using a commercially available kit (R&D Systems) according to the manufacturer's instruction.

### Whole cell lysate preparation

After aspiration of medium, cells were solubilized directly with addition of 2% SDS sample buffer to the plates. Cell lysates were transferred to new tubes, subjected to 15 seconds of sonication to shear DNA, and then stored at -80°C.

### Nuclear and cytoplasmic protein extraction

At various time points, cells were washed with ice-cold PBS, scraped off into PBS and spun down at 500 g for 2 min. Cell pellets were used for nuclear protein extraction using NE-PER Nuclear and Cytoplasmic Extraction Reagents (Thermo Scientific) according to manufacturer's protocol. Protein concentrations were determined using a BCA protein assay kit (Thermo Scientific).

### Western blotting

Samples, loaded equally and resolved on 4–20% SDS polyacrylamide gels were transferred to polyvinylidene difluoride membranes. Membranes were blocked in TBS with 0.1% Tween-20 and 5% dry milk for 1 h at room temperature and then incubated with primary antibodies at 4°C overnight at  $\geq 1/1000$  dilutions. After incubation with horseradish peroxidase-conjugated secondary antibodies at 1/10,000 dilution for 1 h at room temperature, signal was detected using Western Dura Extended Duration Substrate and imaged with a HD2 CCD camera (Alpha Innotech, San Leandro, CA). When multiple probing was needed, membranes were stripped off immunoglobulin with restore stripping buffer before re-probing.

### Statistical analysis

Results are expressed as the mean  $\pm$  standard deviation, compiled from *n* replicate experiments. Statistical significance was analyzed by one-way analysis of variance; correction for repeated measures was performed using Dunnett or Bonferroni post-tests where appropriate. All calculations were performed using GraphPad Prism (GraphPad Software, San Diego, CA) with *p* < 0.05 considered significant.

## Results

### Localization of progesterone receptors in BV-2 cells

To study the effects of progesterone in microglia, the expression of progesterone receptors was first examined. Utilizing immunofluorescence staining with antibody recognizing both PR-A and PR-B isoforms, under complete medium condition, co-localization of progesterone receptors (red) with nucleus (DAPI, blue) was observed, suggesting nuclear localization of progesterone receptors in BV-2 cells (Figure 1). Cytoplasmic distribution of PRs (red) was

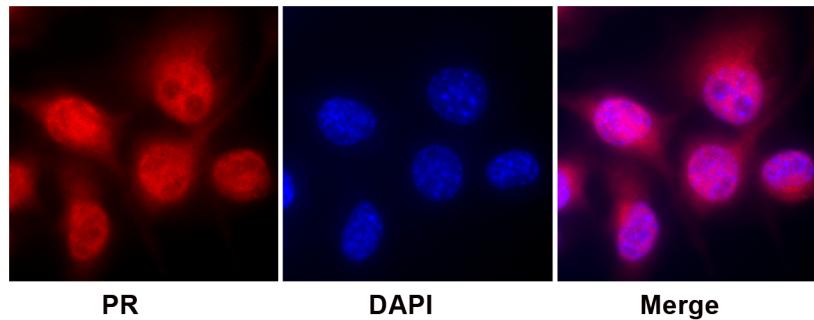

**Figure 1. Localization of progesterone receptors in BV-2 microglia.** Immunofluorescence staining detected the distribution of progesterone receptors in both nucleus and cytoplasm by some colocalization of receptors (PR, red) with nuclei (DAPI, blue). doi:10.1371/journal.pone.0103969.g001

also detected. Taken together, PRs are expressed in both the cytoplasm and nucleus of BV-2 cells.

### Progesterone attenuated LPS-mediated TNF- $\alpha$ production

To determine progesterone's role in cytokine production, 4 h of LPS (30 ng/ml) exposure was used to stimulate BV-2 cell cytokine production in the presence of escalating doses of progesterone. Pretreatment of progesterone dose-dependently attenuated LPS-induced soluble TNF- $\alpha$  (sTNF- $\alpha$ ) production in the supernatant. Significant sTNF- $\alpha$  decrease (approximately 20%) occurred with  $10^{-7}$  and  $10^{-6}$  M progesterone (Figure 2A). In time course experiments, as the precursor of sTNF- $\alpha$ , transmembrane TNF- $\alpha$  (mTNF- $\alpha$ ) expression on BV-2 cells was found to increase at 1 h, reached maximum at 4 h, and then gradually decreased to 1-h levels by 24 h after LPS addition (Figure 2B). Progesterone also reduced LPS-induced mTNF- $\alpha$  expression in a dose dependent manner with similar maximal reduction at both  $10^{-7}$  and  $10^{-6}$  M (Figure 2C). Since  $10^{-7}$  M is within the physiological concentration range of progesterone in blood in the female mouse [37], it was used for further experiments. Finally, mifepristone, a progesterone receptor antagonist, reversed progesterone's effect on mTNF- $\alpha$  expression starting at  $10^{-9}$  M (Figure 2D, 2E).

### Progesterone decreased LPS-induced iNOS and COX-2 expression

To assess progesterone's role in modulating production of NO and PGE<sub>2</sub> in BV-2 cells, intracellular iNOS and COX-2 expression were measured. iNOS and COX-2 expression in BV-2 cells were increased beginning at 4 h, maximized at 6 h, and present through 24 h after LPS exposure (Figure 3A). Progesterone pretreatment decreased LPS-induced iNOS and COX-2 expression in a dose-dependent fashion, with maximal reduction at both  $10^{-7}$  and  $10^{-6}$  M (Figure 3B). Mifepristone inhibited progesterone's effect (Figure 3C, D, E).

### Progesterone suppressed LPS-induced NF- $\kappa$ B activation

To assess progesterone's role in modulating NF- $\kappa$ B activation in BV-2 cells, phosphorylation of inhibitory  $\kappa$ B $\alpha$  (I $\kappa$ B $\alpha$ ) and p65 and nuclear translocation of p65 were measured. I $\kappa$ B $\alpha$  and p65 phosphorylation was increased starting at 5 and 15 min respectively, reached maximum at 1–2 h, and was present through 24 h after LPS addition (Figure 4A). I $\kappa$ B $\alpha$  was decreased starting at 5 min, reached maximal reduction at 1 h, and started returning to basal level 2 h after LPS exposure. This indicates LPS induced I $\kappa$ B $\alpha$  degradation (Figure 4A). p65 translocation from the cytoplasm to the nucleus occurred by 15 min and reached

maximal effect at 30 min of LPS exposure (Figure 4F). Progesterone pretreatment decreased I $\kappa$ B $\alpha$  and p65 phosphorylation (Figure 4B) and p65 translocation from cytoplasm to nucleus (Figure 4G, H), indicating progesterone suppresses NF- $\kappa$ B activation. Moreover, mifepristone suppressed progesterone's inhibition of p65, I $\kappa$ B $\alpha$  phosphorylation (Figure 4C, D, E), and nuclear translocation (Figure 4G, H).

### Progesterone decreased LPS-mediated p38, JNK, and ERK MAPKs phosphorylation

To assess progesterone's role in modulating MAPK activation in BV-2 cells, phosphorylation of p38, JNK, and ERK was measured. Time course experiments showed that phosphorylation of p38 was increased at 1 h, reached maximum at 2 h, and was present through 24 h after LPS addition, never returning to basal level (Figure 5A). JNK and ERK phosphorylation was increased beginning at 1 h, reached maximum at 4 h, and was present through 24 h after LPS exposure (Figure 5A). Therefore, 4 h stimulation of LPS was chosen for further MAPK studies. Progesterone pretreatment dose-dependently reduced LPS-stimulated p38, JNK, and ERK phosphorylation (Figure 5B). Mifepristone reversed progesterone's effects (Figure 5C, D).

### Post-treatment progesterone did not alter LPS-induced inflammation

The effects of post-treatment progesterone were examined in LPS-stimulated BV-2 cells. P-p65, p-I $\kappa$ B $\alpha$ , iNOS, COX-2 and p-p38 expression were not affected by post-treatment dose ( $10^{-7}$  M) of progesterone given 5, 30 or 60 min post-LPS stimulation (Figure 6).

## Discussion

In this study, progesterone's effects on TNF- $\alpha$ , iNOS, and COX-2 expression in LPS-stimulated BV-2 microglia were investigated as possible molecular mechanisms for the downregulation of post-injury neuroinflammatory responses mediated by NF- $\kappa$ B and MAPK pathways. LPS upregulated TNF- $\alpha$ , iNOS, and COX-2 expression in BV-2 cells. Progesterone attenuated LPS-stimulated TNF- $\alpha$ , iNOS, and COX-2 expression in a dose-dependent fashion. In addition, progesterone suppressed LPS-induced NF- $\kappa$ B activation by decreasing I $\kappa$ B $\alpha$  phosphorylation, p65 phosphorylation, and p65 nuclear translocation. Moreover, progesterone reduced LPS-mediated phosphorylation of p38, JNK, and ERK MAPKs in BV-2 cells. The progesterone antagonist mifepristone antagonized these effects.

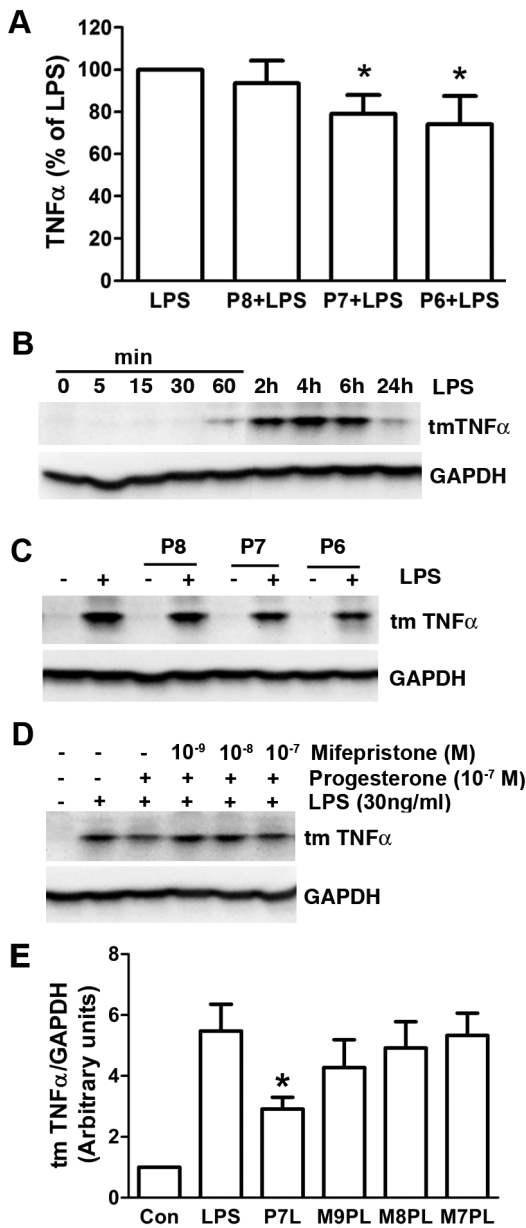

**Figure 2. Progesterone attenuated LPS-stimulated TNF- $\alpha$  production.** Cells were treated in serum-free DMEM. (A) Pretreatment of progesterone for 1 h dose-dependently suppressed LPS (30 ng/ml, 4 h)-mediated TNF- $\alpha$  secretion in cell supernatants. \* $P < 0.05$  compared with LPS group,  $n = 7$ . P8, P7 and P6: progesterone at  $10^{-8}$ ,  $10^{-7}$  and  $10^{-6}$  M. (B) The representative immunoblot demonstrated time course changes for transmembrane TNF- $\alpha$  (tmTNF $\alpha$ ) and glyceraldehyde-3-phosphate dehydrogenase (GAPDH, a loading control) with LPS (30 ng/ml) stimulation from 0 to 24 h. (C) Pretreatment of progesterone for 1 h dose-dependently decreased LPS (30 ng/ml, 4 h)-stimulated tmTNF- $\alpha$  expression. The representative immunoblot (D) and summary of band densitometric quantifications (E) showed that progesterone receptor antagonist mifepristone reversed progesterone's effect on tmTNF- $\alpha$  expression induced by 4 h LPS stimulation. \* $P < 0.05$  compared to LPS group,  $n = 3$ . P7L: progesterone  $10^{-7}$  M+LPS; M9PL: mifepristone  $10^{-9}$  M+progesterone  $10^{-7}$  M+LPS; M8PL: mifepristone  $10^{-8}$  M+progesterone  $10^{-7}$  M+LPS; M7PL: mifepristone  $10^{-7}$  M+progesterone  $10^{-7}$  M+LPS.  
doi:10.1371/journal.pone.0103969.g002

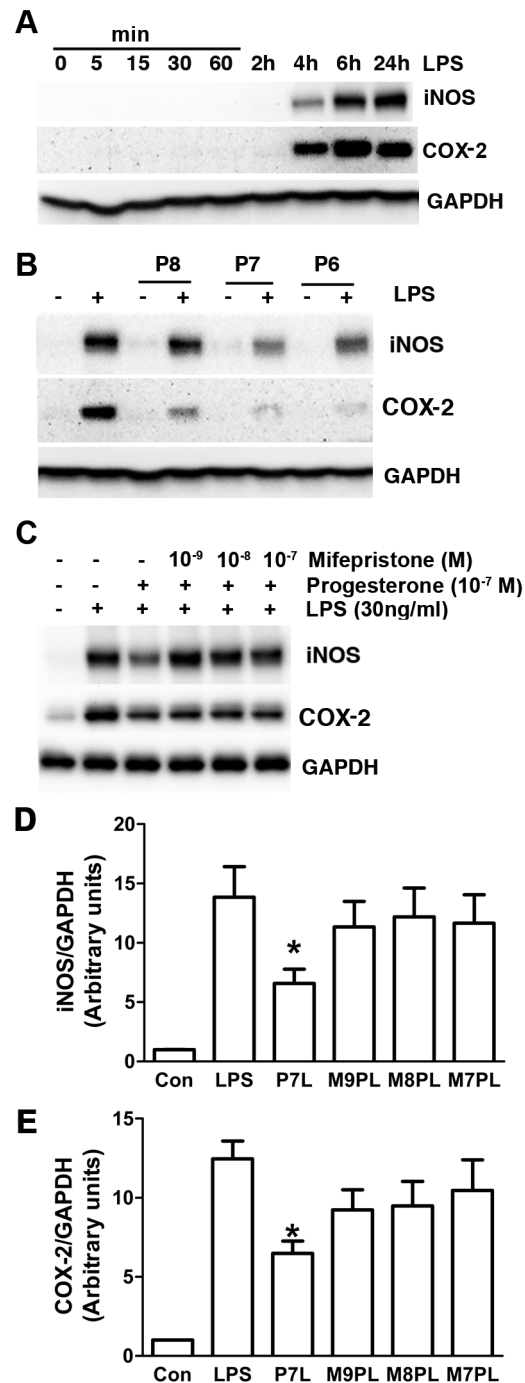

**Figure 3. Progesterone decreased LPS-induced iNOS and COX-2 expression.** Cells were treated in serum-free DMEM. (A) Representative immunoblots demonstrate time course changes for iNOS, COX-2 and GAPDH with LPS (30 ng/ml) stimulation. (B) Pretreatment of progesterone for 1 h dose-dependently decreased LPS (30 ng/ml, 4 h)-stimulated iNOS and COX-2 expression. P8, P7 and P6: progesterone at  $10^{-8}$ ,  $10^{-7}$  and  $10^{-6}$  M. (C, D, E) Progesterone receptor antagonist mifepristone suppressed progesterone's effect on LPS-induced iNOS and COX 2 expression for 20 h. \* $P < 0.05$  compared to LPS group,  $n = 3$ . P7L: progesterone  $10^{-7}$  M+LPS; M9PL: mifepristone  $10^{-9}$  M+progesterone  $10^{-7}$  M+LPS; M8PL: mifepristone  $10^{-8}$  M+progesterone  $10^{-7}$  M+LPS; M7PL: mifepristone  $10^{-7}$  M+progesterone  $10^{-7}$  M+LPS.  
doi:10.1371/journal.pone.0103969.g003

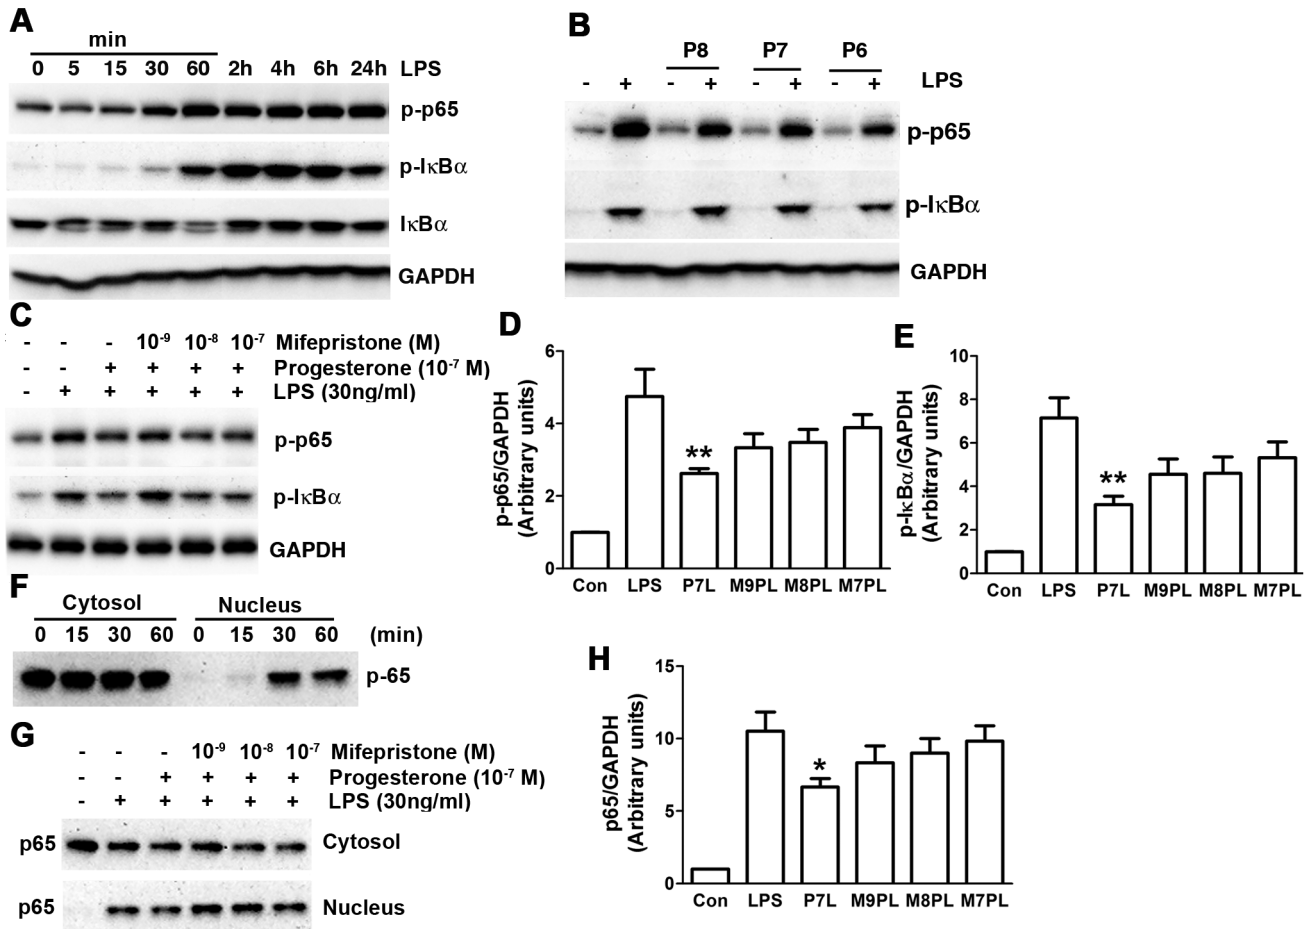

**Figure 4. Progesterone suppressed LPS-induced NF-κB activation.** Cells were treated in serum-free DMEM. (A) Representative immunoblots demonstrate time course changes for p-p65, p-IκBα, IκBα and GAPDH. (B) Progesterone pretreatment for 1 h dose-dependently decreased LPS (30 ng/ml, 4 h)-stimulated p65 and IκBα phosphorylation. P8, P7 and P6: progesterone at 10<sup>-8</sup>, 10<sup>-7</sup> and 10<sup>-6</sup> M. (C, D, E) Progesterone receptor antagonist mifepristone suppressed progesterone's effect on p65 and IκBα phosphorylation. \**P*<0.05 compared to LPS group, n=3. (F) LPS induced translocation of p65 from cytoplasm to nucleus. (G, H) Mifepristone reversed progesterone's inhibition effect of p65 translocation by LPS for 1 hour. P7L: progesterone 10<sup>-7</sup> M+LPS; M9PL: mifepristone 10<sup>-9</sup> M+progesterone 10<sup>-7</sup> M+LPS; M8PL: mifepristone 10<sup>-8</sup> M+progesterone 10<sup>-7</sup> M+LPS; M7PL: mifepristone 10<sup>-7</sup> M+progesterone 10<sup>-7</sup> M+LPS. doi:10.1371/journal.pone.0103969.g004

Inflammation is a key factor of secondary brain damage. TNF-α, a potent proinflammatory cytokine, is upregulated immediately after acute brain injury [38,39]. mTNF-α can act as a ligand to type 1 and 2 TNF-α receptors of target cells and mediates cytotoxic activity. Thus, mTNFα is involved in local inflammatory responses [40,41]. sTNF-α is cleaved from its precursor, mTNF-α, by TNF-α-converting enzyme and released to remote tissue. In this study, progesterone pretreatment decreased not only sTNF-α production, but also mTNF-α expression, indicating inhibition by progesterone was upstream of mTNFα formation. Further, progesterone suppressed the biological activities mediated by both sTNF-α and mTNF-α in BV-2 cells, such as neuroinflammation and neuronal damage.

It has been extensively reported that NF-κB plays a critical role in regulation of inflammatory responses [26,42,43]. In mammals, five NF-κB subunits have been identified, including p50, p52, p65 (RelA), RelB and c-Rel [44]. NF-κB consists of dimers composed primarily of p65 and p50 subunits. Inactive NF-κB dimers are sequestered in the cytoplasm by association with IκB proteins. Typically, phosphorylation of IκB by IκB kinases targets it for ubiquitination and subsequent proteasomal degradation. This

leads to release and translocation of NF-κB dimers to the nucleus. In the nucleus, NF-κB binds to the specific DNA sequence in the promoter region of target genes and modulates their transcription. The genes of TNF-α, iNOS, and COX-2 are known transcription targets of NF-κB [31,45].

In agreement with the involvement of NF-κB in regulating TNF-α, iNOS, and COX-2 gene transcription, mTNF-α expression was first observed at 1 h and iNOS and COX-2 expression was first observed at 4 h in BV-2 microglia after LPS addition, while the NF-κB pathway was activated as early as 15 min after LPS exposure. LPS dramatically induced IκB degradation from 5 min, and IκBα protein was almost undetectable at 1 h. NF-κB p65 nuclear translocation started at 15 min and reached maximum at 30 min after LPS exposure. Progesterone suppressed the LPS-induced p65 translocation, and its receptor antagonist mifepristone completely blocked the inhibition by progesterone, indicating NF-κB in the possible mechanisms by which progesterone decreases proinflammatory mediators. Progesterone has been reported to suppress NF-κB activity by increase IκBα transcription or inhibit p65 expression [46].

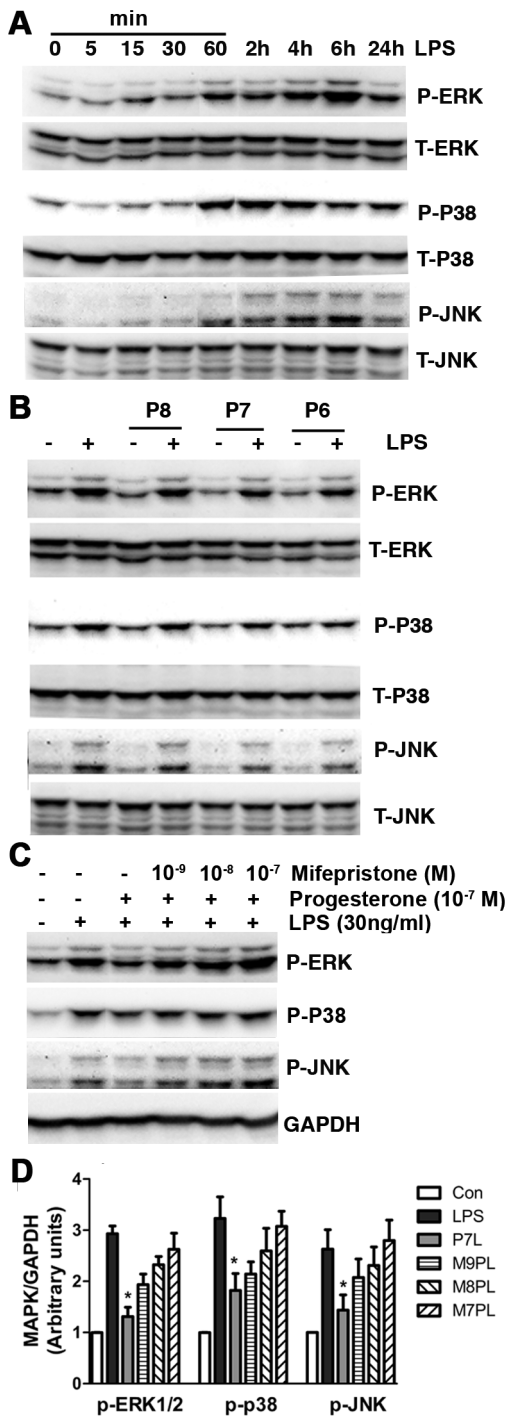

**Figure 5. Progesterone reduced LPS-mediated phosphorylation of P38, JNK and ERK MAPKs.** Cells were treated in serum-free DMEM. (A) Representative immunoblots demonstrate time course changes for p38, JNK and ERK MAPKs phosphorylation with LPS (30 ng/ml) stimulation. (B) Progesterone Pretreatment for 1 h dose-dependently decreased LPS (30 ng/ml, 4 h)-induced p38, JNK and ERK phosphorylation. P8, P7 and P6: progesterone at  $10^{-8}$ ,  $10^{-7}$  and  $10^{-6}$  M. (C, D) Progesterone receptor antagonist mifepristone reversed progesterone's effect on MAPK phosphorylation. \* $P < 0.05$  compared to LPS group,  $n = 3$ . P7L: progesterone  $10^{-7}$  M+LPS; M9PL: mifepristone  $10^{-9}$  M+progesterone  $10^{-7}$  M+LPS; M8PL: mifepristone  $10^{-8}$  M+progesterone  $10^{-7}$  M+LPS; M7PL: mifepristone  $10^{-7}$  M+progesterone  $10^{-7}$  M+LPS.  
doi:10.1371/journal.pone.0103969.g005

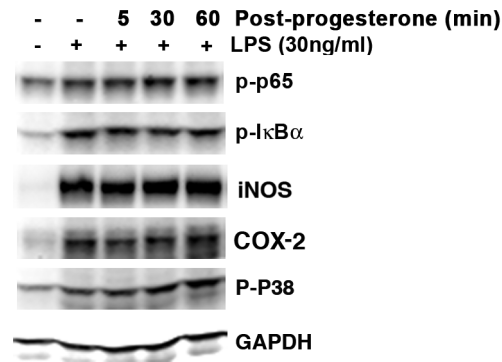

**Figure 6. Post-treatment progesterone did not affect LPS-induced inflammation in BV-2 cells.** Cells were treated in serum-free DMEM. Progesterone at  $10^{-7}$  M was given 5, 30 or 60 min after LPS (30 ng/ml) addition.  $N = 3$ .  
doi:10.1371/journal.pone.0103969.g006

Aside from NF- $\kappa$ B, the MAPK pathway has also been reported to be involved in neuroinflammation, especially the p38 pathway [47,48,49,50]. Compared to wild type mouse microglia, primary microglia cultures from p38 $\alpha$  MAPK knockout mice showed a diminished proinflammatory cytokine response to LPS, suggesting that the p38 $\alpha$  MAPK pathway is a key regulator of proinflammatory cytokine overproduction [33]. In our study, p38, ERK, and JNK phosphorylation was first observed 1 h after LPS addition, progesterone attenuated this phosphorylation, and the antagonist mifepristone reversed progesterone's effect, implicating the possible involvement of MAPK pathways in the microglial modulatory effects of progesterone.

Interestingly, these effects of progesterone were lost when administered after LPS-stimulation. Since microglia activation after acute brain injury is a relatively gradual process, which starts as early as a couple of hours and peaks at 3 to 5 days after ischemic stroke or intracerebral hemorrhage [51], the present finding suggests that progesterone's therapeutic window should be chosen before the peak time of microglia activation.

Although the BV-2 cell line has been most commonly used in microglia study and evaluated to be a valid substitute for primary microglia in many conditions, clear differences between BV-2 and primary microglia was also observed such as stronger reaction to LPS and a much larger number of genes regulated significantly by LPS in primary microglia [35]. Even primary neonatal microglia were reported to function differently from adult microglia [52], suggesting that primary adult microglia might be more appropriate for *in vitro* study of aged CNS diseases.

**Conclusion**

In LPS-stimulated BV-2 microglia, progesterone exhibits anti-inflammatory effects by suppressing NF- $\kappa$ B and MAPK activation. This is associated with downregulation of proinflammatory mediator expression. Thus, progesterone may have a role as a potential neuroprotective agent to treat acute neuroinflammation, consistent with its reported efficacy in preclinical models of acute brain injury. Confirmation in primary adult microglial cultures will serve to strengthen this proposition.

**Author Contributions**

Conceived and designed the experiments: BL MLJ. Performed the experiments: BL BM. Analyzed the data: BL BM MLJ. Contributed reagents/materials/analysis tools: HND DSW DTL MLJ. Contributed to the writing of the manuscript: BL HND DSW DTL MLJ.

## References

- Vallee M, Mayo W, Darnaudey M, Corpechot C, Young J, et al. (1997) Neurosteroids: deficient cognitive performance in aged rats depends on low pregnenolone sulfate levels in the hippocampus. *Proc Natl Acad Sci U S A* 94: 14865–14870.
- Wagner CK (2006) The many faces of progesterone: a role in adult and developing male brain. *Front Neuroendocrinol* 27: 340–359.
- Brinton RD, Thompson RF, Foy MR, Baudry M, Wang J, et al. (2008) Progesterone receptors: form and function in brain. *Front Neuroendocrinol* 29: 313–339.
- Singh M, Su C (2013) Progesterone and neuroprotection. *Horm Behav* 63: 284–290.
- Mani S (2008) Progesterone receptor subtypes in the brain: the known and the unknown. *Endocrinology* 149: 2750–2756.
- Zhu Y, Hanna RN, Schaaf MJ, Spaink HP, Thomas P (2008) Candidates for membrane progesterin receptors—past approaches and future challenges. *Comp Biochem Physiol C Toxicol Pharmacol* 148: 381–389.
- Singh M, Su C, Ng S (2013) Non-genomic mechanisms of progesterone action in the brain. *Front Neurosci* 7: 159.
- Mani SK, Oyola MG (2012) Progesterone signaling mechanisms in brain and behavior. *Front Endocrinol (Lausanne)* 3: 7.
- Roof RL, Duvdevani R, Heyburn JW, Stein DG (1996) Progesterone rapidly decreases brain edema: treatment delayed up to 24 hours is still effective. *Exp Neurol* 138: 246–251.
- Roof RL, Hoffman SW, Stein DG (1997) Progesterone protects against lipid peroxidation following traumatic brain injury in rats. *Mol Chem Neuropathol* 31: 1–11.
- Pettus EH, Wright DW, Stein DG, Hoffman SW (2005) Progesterone treatment inhibits the inflammatory agents that accompany traumatic brain injury. *Brain Res* 1049: 112–119.
- Robertson CL, Puskas A, Hoffman GE, Murphy AZ, Saraswati M, et al. (2006) Physiologic progesterone reduces mitochondrial dysfunction and hippocampal cell loss after traumatic brain injury in female rats. *Exp Neurol* 197: 235–243.
- Cutler SM, Cekic M, Miller DM, Wali B, VanLandingham JW, et al. (2007) Progesterone improves acute recovery after traumatic brain injury in the aged rat. *J Neurotrauma* 24: 1475–1486.
- Shahrokhi N, Khaksari R, Soltani Z, Mahmoodi M, Nakhace N (2010) Effect of sex steroid hormones on brain edema, intracranial pressure, and neurologic outcomes after traumatic brain injury. *Can J Physiol Pharmacol* 88: 414–421.
- Chen J, Chopp M, Li Y (1999) Neuroprotective effects of progesterone after transient middle cerebral artery occlusion in rat. *J Neurol Sci* 171: 24–30.
- Kumon Y, Kim SC, Tompkins P, Stevens A, Sakaki S, et al. (2000) Neuroprotective effect of postischemic administration of progesterone in spontaneously hypertensive rats with focal cerebral ischemia. *J Neurosurg* 92: 848–852.
- Cervantes M, Gonzalez-Vidal MD, Ruelas R, Escobar A, Morali G (2002) Neuroprotective effects of progesterone on damage elicited by acute global cerebral ischemia in neurons of the caudate nucleus. *Arch Med Res* 33: 6–14.
- Morali G, Letechipia-Vallejo G, Lopez-Loeza E, Montes P, Hernandez-Morales L, et al. (2005) Post-ischemic administration of progesterone in rats exerts neuroprotective effects on the hippocampus. *Neurosci Lett* 382: 286–290.
- Ishrat T, Sayeed I, Atif F, Stein DG (2009) Effects of progesterone administration on infarct volume and functional deficits following permanent focal cerebral ischemia in rats. *Brain Res* 1257: 94–101.
- Dang J, Mitkari B, Kipp M, Beyer C (2011) Gonadal steroids prevent cell damage and stimulate behavioral recovery after transient middle cerebral artery occlusion in male and female rats. *Brain Behav Immun* 25: 715–726.
- Gibson CL, Coomber B, Murphy SP (2011) Progesterone is neuroprotective following cerebral ischaemia in reproductively ageing female mice. *Brain* 134: 2125–2133.
- Wang Z, Zuo G, Shi XY, Zhang J, Fang Q, et al. (2011) Progesterone administration modulates cortical TLR4/NF-kappaB signaling pathway after subarachnoid hemorrhage in male rats. *Mediators Inflamm* 2011: 848309.
- Yan F, Hu Q, Chen J, Wu C, Gu C, et al. (2013) Progesterone attenuates early brain injury after subarachnoid hemorrhage in rats. *Neurosci Lett* 543: 163–167.
- Wright DW, Kellermann AL, Hertzberg VS, Clark PL, Frankel M, et al. (2007) ProTECT: a randomized clinical trial of progesterone for acute traumatic brain injury. *Ann Emerg Med* 49: 391–402, 402 e391–392.
- Xiao G, Wei J, Yan W, Wang W, Lu Z (2008) Improved outcomes from the administration of progesterone for patients with acute severe traumatic brain injury: a randomized controlled trial. *Crit Care* 12: R61.
- Zhao X, Zhang Y, Strong R, Zhang J, Grotta JC, et al. (2007) Distinct patterns of intracerebral hemorrhage-induced alterations in NF-kappaB subunit, iNOS, and COX-2 expression. *J Neurochem* 101: 652–663.
- Block ML, Zecca L, Hong JS (2007) Microglia-mediated neurotoxicity: uncovering the molecular mechanisms. *Nat Rev Neurosci* 8: 57–69.
- Loane DJ, Byrnes KR (2010) Role of microglia in neurotrauma. *Neurotherapeutics* 7: 366–377.
- Gomes-Leal W (2012) Microglial physiopathology: how to explain the dual role of microglia after acute neural disorders? *Brain Behav* 2: 345–356.
- Marks-Konczalik J, Chu SC, Moss J (1998) Cytokine-mediated transcriptional induction of the human inducible nitric oxide synthase gene requires both activator protein 1 and nuclear factor kappaB-binding sites. *J Biol Chem* 273: 22201–22208.
- D'Acquisto F, Iuvone T, Rombola L, Sautebin L, Di Rosa M, et al. (1997) Involvement of NF-kappaB in the regulation of cyclooxygenase-2 protein expression in LPS-stimulated J774 macrophages. *FEBS Lett* 418: 175–178.
- Jang BC, Paik JH, Kim SP, Shin DH, Song DK, et al. (2005) Catalase induced expression of inflammatory mediators via activation of NF-kappaB, PI3K/AKT, p70S6K, and JNKs in BV2 microglia. *Cell Signal* 17: 625–633.
- Bachstetter AD, Xing B, de Almeida L, Dimayuga ER, Watterson DM, et al. (2011) Microglial p38alpha MAPK is a key regulator of proinflammatory cytokine up-regulation induced by toll-like receptor (TLR) ligands or beta-amyloid (Abeta). *J Neuroinflammation* 8: 79.
- Bocchini V, Mazzolla R, Barluzzi R, Blasi E, Sick P, et al. (1992) An immortalized cell line expresses properties of activated microglial cells. *J Neurosci Res* 31: 616–621.
- Henn A, Lund S, Hedtjarn M, Schratzenholz A, Porzgen P, et al. (2009) The suitability of BV2 cells as alternative model system for primary microglia cultures or for animal experiments examining brain inflammation. *ALTEX* 26: 83–94.
- Burguillos MA, Deierborg T, Kavanagh E, Persson A, Hajji N, et al. (2011) Caspase signalling controls microglia activation and neurotoxicity. *Nature* 472: 319–324.
- Nelson JF, Felicio LS, Osterburg HH, Finch CE (1992) Differential contributions of ovarian and extraovarian factors to age-related reductions in plasma estradiol and progesterone during the estrous cycle of C57BL/6J mice. *Endocrinology* 130: 805–810.
- Gregersen R, Lamberts K, Finsen B (2000) Microglia and macrophages are the major source of tumor necrosis factor in permanent middle cerebral artery occlusion in mice. *J Cereb Blood Flow Metab* 20: 53–65.
- Lei B, Dawson HN, Roulhac-Wilson B, Wang H, Laskowitz DT, et al. (2013) Tumor necrosis factor alpha antagonism improves neurological recovery in murine intracerebral hemorrhage. *J Neuroinflammation* 10: 103.
- Hehlgans T, Pfeffer K (2005) The intriguing biology of the tumour necrosis factor/tumour necrosis factor receptor superfamily: players, rules and the games. *Immunology* 115: 1–20.
- Zhou Z, Peng X, Hagshenas J, Insolera R, Fink DJ, et al. (2010) A novel cell-cell signaling by microglial transmembrane TNFalpha with implications for neuropathic pain. *Pain* 151: 296–306.
- Vallabhapuram S, Karin M (2009) Regulation and function of NF-kappaB transcription factors in the immune system. *Annu Rev Immunol* 27: 693–733.
- Ridder DA, Schwanager M (2009) NF-kappaB signaling in cerebral ischemia. *Neuroscience* 158: 995–1006.
- Hayden MS, Ghosh S (2008) Shared principles in NF-kappaB signaling. *Cell* 132: 344–362.
- Xie QW, Kashiwabara Y, Nathan C (1994) Role of transcription factor NF-kappa B/Rel in induction of nitric oxide synthase. *J Biol Chem* 269: 4705–4708.
- Hardy DB, Janowski BA, Chen CC, Mendelson CR (2008) Progesterone receptor inhibits aromatase and inflammatory response pathways in breast cancer cells via ligand-dependent and ligand-independent mechanisms. *Mol Endocrinol* 22: 1812–1824.
- Bhat NR, Zhang P, Lee JC, Hogan EL (1998) Extracellular signal-regulated kinase and p38 subgroups of mitogen-activated protein kinases regulate inducible nitric oxide synthase and tumor necrosis factor-alpha gene expression in endotoxin-stimulated primary glial cultures. *J Neurosci* 18: 1633–1641.
- Zhang P, Hogan EL, Bhat NR (1998) Activation of JNK/SAPK in primary glial cultures: II. Differential activation of kinase isoforms corresponds to their differential expression. *Neurochem Res* 23: 219–225.
- Bhat NR, Feinstein DL, Shen Q, Bhat AN (2002) p38 MAPK-mediated transcriptional activation of inducible nitric-oxide synthase in glial cells. Roles of nuclear factors, nuclear factor kappa B, cAMP response element-binding protein, CCAAT/enhancer-binding protein-beta, and activating transcription factor-2. *J Biol Chem* 277: 29584–29592.
- Waetzig V, Czeloth K, Hidding U, Mielke K, Kanzow M, et al. (2005) c-Jun N-terminal kinases (JNKs) mediate pro-inflammatory actions of microglia. *Glia* 50: 235–246.
- Taylor RA, Sansing LH (2013) Microglial responses after ischemic stroke and intracerebral hemorrhage. *Clin Dev Immunol* 2013: 746068.
- Floden AM, Combs CK (2006) Beta-amyloid stimulates murine postnatal and adult microglia cultures in a unique manner. *J Neurosci* 26: 4644–4648.
